# Supplementary material for: Caboxamycin with Antiviral Activity in CVB3-Induced Myocarditis Mouse Model
Source: Preprints.org preprint supplement (doi:10.20944/preprints202309.2120.v1), 2023-09-29

***Supporting Information for***

Caboxamycin with Antiviral Activity in CVB3-Induced Myocarditis Mouse Model

Hong-Gi Kim1,#, Prima F. Hillman2,#, You-Jeung Lee3, Ha-Eun Jeon1,Byung-Kwan Lim1,*, and Sang-Jip Nam2,*

1Department of Biomedical Science, Jungwon University, Goesan-gun, Chungbuk 28024, Republic of Korea; [ghdrl368@naver.com](mailto:ghdrl368@naver.com) (H.G.K); [wjs20007@gmail.com](mailto:wjs20007@gmail.com) (H.E.J); [bklim@jwu.ac.kr](mailto:bklim@jwu.ac.kr) (B.K.L)

2Department of Chemistry and Nanoscience, Ewha Womans University, Seoul 03760, Republic [primafitriah@gmail.com](mailto:primafitriah@gmail.com) (P.F.H); [sjnam@ewha.ac.kr](mailto:sjnam@ewha.ac.kr) (S.-J.N)

3Division of Cardiology, Samsung Medical Center, 50 Irwon dong, Gangnam-gu, Seoul 06351, Republic of Korea; [eelulee@daum.net](mailto:eelulee@daum.net) (Y.J.L)

**#These authors equally contributed to this work**

*****Correspondence: [bklim@jwu.ac.kr](mailto:bklim@jwu.ac.kr) (B.K.L); [sjnam@ewha.ac.kr](mailto:sjnam@ewha.ac.kr) (S.-J.N) **Table of Contents**

| **Table S1.** Real-time PCR primer sequences……………………………………………………………………..………………………. | **S3** |
| --- | --- |
| **Figure S1.** 1H NMR Spectrum of Caboxamycin (**1**) in CDCl3…………………………………………………………………….……….. | **S4** |
| **Figure S2.** 13C NMR Spectrum of Caboxamycin (**1**) in CDCl3 ………………………………………………………………………….…. | **S5** |

**Table S1.** Real-time PCR primer sequences

|  | Sense (5’→3’) | Antisense (5’→3’) |
| --- | --- | --- |
| IL-1 | TTG ACG GAC CCC AAA GAG TG | ACT CCT GTA CTC GTG GAA GA |
| IL-6 | GTA CTC CAG AAG ACC AGA GG | TGC TGG TGA CAA CCA CGG CC |
| TNF- | TTG ACC TCA GCG CTG AGT TG | CCT GTA GCC CAC GTC GTA GC |
| MCP-1 | ACC TGG ATC GGA ACC AAA TG | CCT TAG GGC AGA TGC AGT TTT AA |
| CD4 | GTT CAG GAC AGC GAC TTC TGG A | GAA GGA GAA CTC CGC TGA CTC T |
| CD8 | ACT ACC AAG CCA GTG CTG CGA A | ATC ACA GGC GAA GTC CAA TCC G |
| CD68 | CTT CCC ACA GGC AGC ACA G | AAT GAT GAG AGG CAG CAA GAG G |
| NPPA | TACAGTGCGGTGTCCAACACAG | TGCTTCCTCAGTCTGCTCACTC |
| Myh7 | GCTGAAAGCAGAAAGAGATTATC | TGGAGTTCTTCTCTTCTGGAG |
| GAPDH | ATC AAC GAC CCC TTC ATT GAC C | CCA GTA GAC TCC ACG ACA TAC TCA GC |

**Figure S1**. 1H NMR Spectrum of Merochlorin G (**1**) in CDCl3


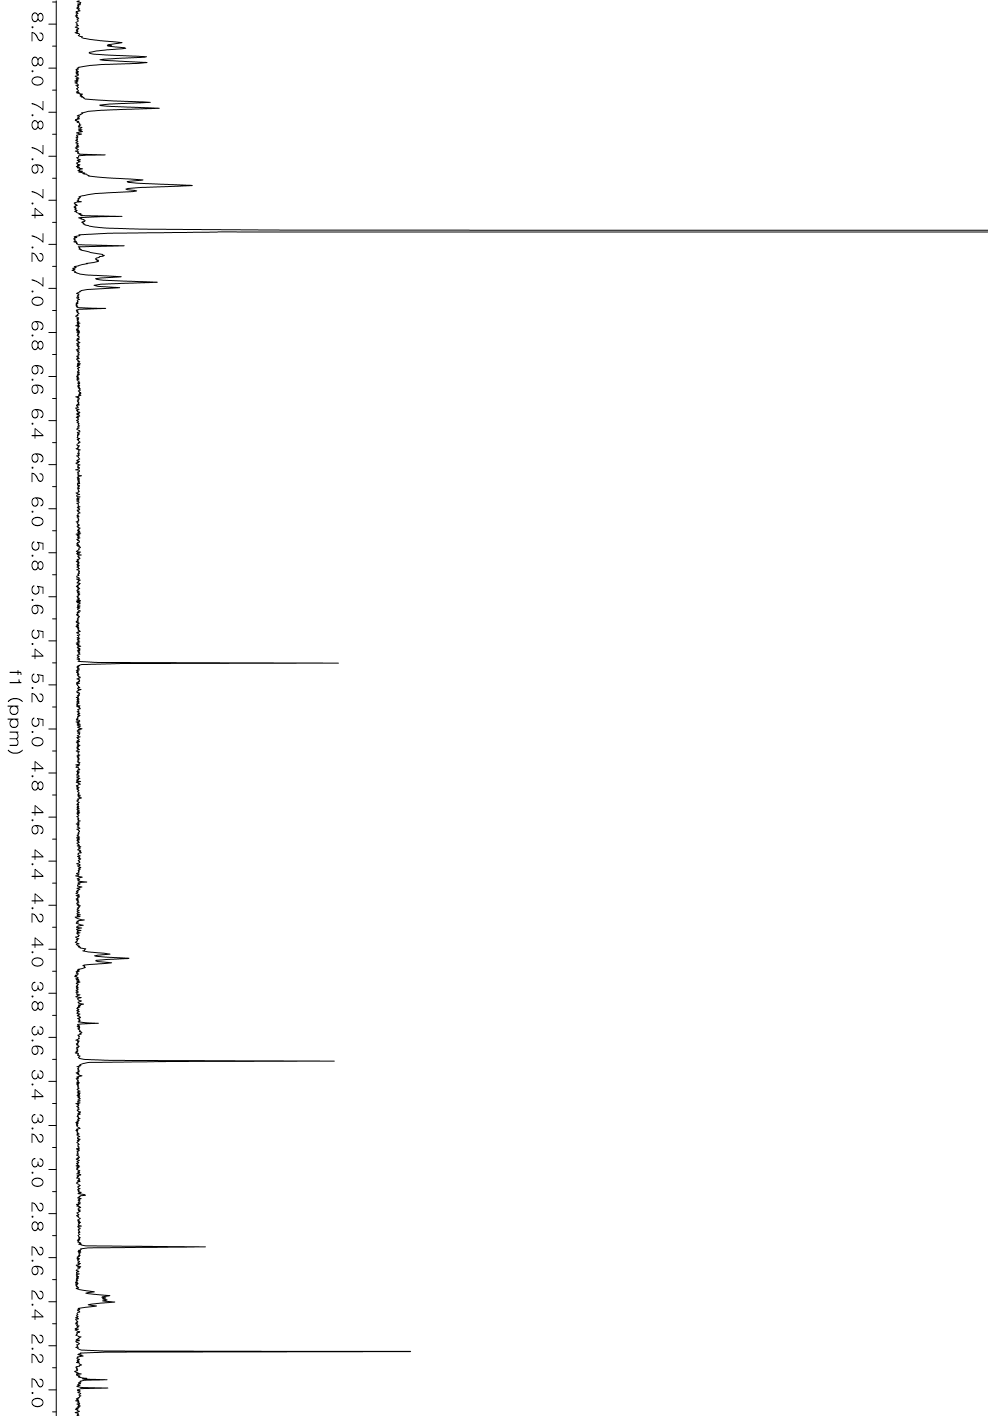


**Figure S2**. 13C NMR Spectrum of Merochlorin G (**1**) in CDCl3


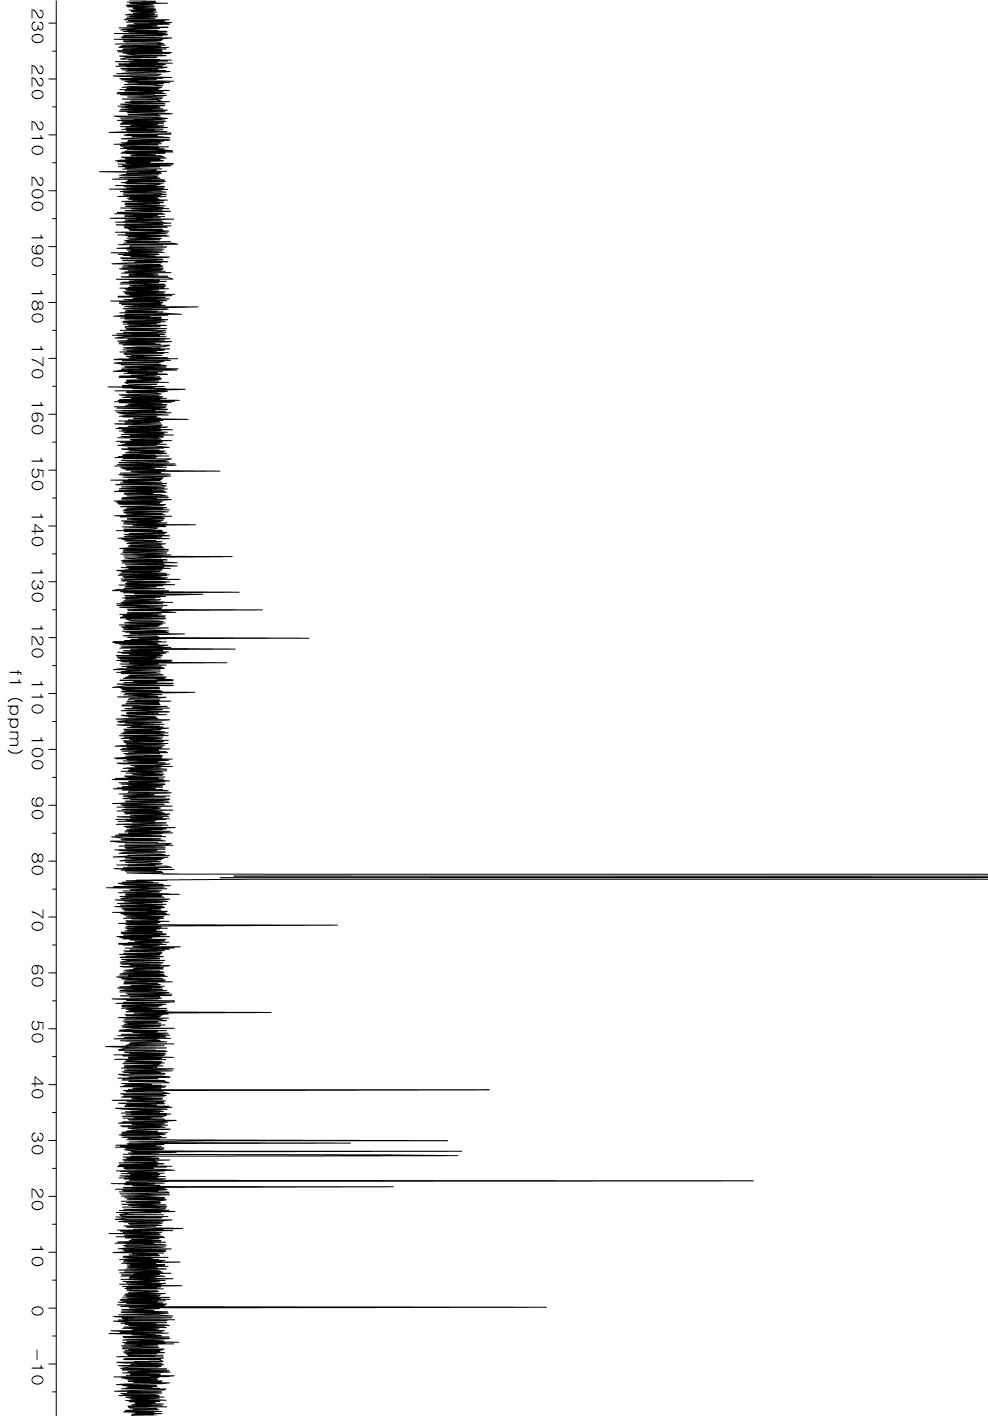

Supplement: Supplementary file 1 [file supplementary]
